# Supplementary material for: Seeding the Spatial Prisoner’s Dilemma with Ulam’s Spiral
Source: Hindawi journal article supplement (doi:10.1155/2023/1649440), 2023-04-25
Supplement: f1 [file 1649440.f1.docx]

**Supplementary Material Files**

**Seeding the spatial prisoner’s dilemma with Ulam’s spiral**

To facilitate replication and further exploration of the results reported in the main text of “Seeding the spatial prisoner’s dilemma with Ulam’s spiral,” the following hyperlinks provide access to supplementary material files. These files range from computer code to data sets to animations of the simulation reported in the main text. Clicking on each hyperlink will initiate the download of the materials listed in the hyperlink name, thus a rough estimation of file size accompanies each link so that users can anticipate the memory demands placed on their computer. I also include a description of the file type so that users know which software applications they need to run in order to make sense of the files.

Computer code provided in the supplementary material files executes the simulations in R and, separately, analyzes the data from the simulations in R. The computer code provides readers with a means of downloading the data directly into the R computing environment for analysis and it guides the reader through the variables in the data set while connecting the analysis to the corresponding information in the results section of the manuscript. The supplementary materials provide direct links to download the data in the event that a user wishes to save a local copy for analysis in a statistical computing environment different than R.

Please note that I have attempted to save all files in widely usable formats (for instance, .txt and .csv) and I have attempted to provide guidance on use within those files. I believe that this approach offers the most-robust and transparent method of information preservation. Still, if you have any questions about the material or its execution, please do not hesitate to contact me, Tim Johnson at either [tjohnson@willamette.edu](mailto:tjohnson@willamette.edu) or [tim.johnson@alumni.stanford.edu](mailto:tim.johnson@alumni.stanford.edu).

1. [R code for running simulations](http://www.willamette.edu/~tjohnson/ulam_spatial_PD_06_15_2022_moore_server_all.txt) (.txt, ≈15KB)

2. [Aggregate data from each run of the simulation](http://www.willamette.edu/~tjohnson/ulam_cooperation/runsdata_all.csv) (.csv, ≈10453KB)

3. [Aggregate data from each generation of each run of the simulation](http://www.willamette.edu/~tjohnson/ulam_cooperation/gensdata_all.csv) (.csv, ≈18821KB)

4. [Data of the population’s configuration in each generation of each run](http://www.willamette.edu/~tjohnson/ulam_complete_strategyxgen.zip) (.zip, ≈39264KB)

5. [R code for analyzing simulation output](http://www.willamette.edu/~tjohnson/ulam_spatial_PD_complete_analysis_06_29_2022.txt) (.txt, ≈20KB)

6. Animations corresponding to runs reported in main text Figure 4 (all .mp4, file sizes below)

(a) [Run corresponding to Figure 4, Panel (a) ( and )](https://www.willamette.edu/~tjohnson/zMovie_b1_14_n101.mp4) (≈637KB)

(b) [Run corresponding to Figure 4, Panel (b) ( and )](https://www.willamette.edu/~tjohnson/zMovie_b1_14_n151.mp4) (≈811KB)

(c) [Run corresponding to Figure 4, Panel (c) ( and )](https://www.willamette.edu/~tjohnson/zMovie_b1_14_n201.mp4) (≈1089KB)

(d) [Run corresponding to Figure 4, Panel (d) ( and )](https://www.willamette.edu/~tjohnson/zMovie_b1_16_n101.mp4) (≈2638KB)

(e) [Run corresponding to Figure 4, Panel (e) ( and )](https://www.willamette.edu/~tjohnson/zMovie_b1_16_n151.mp4) (≈2639KB)

(f) [Run corresponding to Figure 4, Panel (f) ( and )](https://www.willamette.edu/~tjohnson/zMovie_b1_16_n201.mp4) (≈2672KB)

(g) [Run corresponding to Figure 4, Panel (g) ( and )](https://www.willamette.edu/~tjohnson/zMovie_b1_17_n101.mp4) (≈2750KB)

(h) [Run corresponding to Figure 4, Panel (h) ( and )](https://www.willamette.edu/~tjohnson/zMovie_b1_17_n151.mp4) (≈2827KB)

(i) [Run corresponding to Figure 4, Panel (i) ( and )](https://www.willamette.edu/~tjohnson/zMovie_b1_17_n201.mp4) (≈2885KB)

(j) [Run corresponding to Figure 4, Panel (j) ( and )](https://www.willamette.edu/~tjohnson/zMovie_b1_2_n101.mp4) (≈3192KB)

(k) [Run corresponding to Figure 4, Panel (k) ( and )](https://www.willamette.edu/~tjohnson/zMovie_b1_2_n151.mp4) (≈3295KB)

(l) [Run corresponding to Figure 4, Panel (l) ( and )](https://www.willamette.edu/~tjohnson/zMovie_b1_2_n201.mp4) (≈3464KB)

(m) [Run corresponding to Figure 4, Panel (m) ( and](https://www.willamette.edu/~tjohnson/zMovie_b1_25_n101.mp4)  (≈741KB)

(n) [Run corresponding to Figure 4, Panel (n) ( and )](https://www.willamette.edu/~tjohnson/zMovie_b1_25_n151.mp4) (≈3049KB)

(o) [Run corresponding to Figure 4, Panel (o) ( and )](https://www.willamette.edu/~tjohnson/zMovie_b1_25_n201.mp4) (≈3212KB)

(p) [Run corresponding to Figure 4, Panel (m) ( and](https://www.willamette.edu/~tjohnson/zMovie_b1_33_n101.mp4)  (≈741KB)

(q) [Run corresponding to Figure 4, Panel (n) ( and )](https://www.willamette.edu/~tjohnson/zMovie_b1_33_n151.mp4) (≈3049KB)

(r) [Run corresponding to Figure 4, Panel (o) ( and )](https://www.willamette.edu/~tjohnson/zMovie_b1_33_n201.mp4) (≈3212KB)
